# Supplementary material
Source: Springer Nature journal article supplement (https://www.springermedizin.de/resource/supplementary/13256_2011_2140_MOESM2_ESM.pdf/9649194)
Supplement: MOESM2 [file 9649194]

**Table 1.** Results of urinary collection performed upon hospital admission and ten months after cessation of octreotide therapy.

| <b>Parameters</b>                    | <b>During hospitalisation</b> | <b>10 months after hospitalization and stopping octreotide therapy</b> | <b>Normal values</b> |
|--------------------------------------|-------------------------------|------------------------------------------------------------------------|----------------------|
| <b>NaFE (%)</b>                      | <b>10.1</b>                   | <b>1.07</b>                                                            | <b>&lt;1</b>         |
| <b>UFE (%)</b>                       | <b>49.4</b>                   | <b>36.6</b>                                                            | <b>&lt;35</b>        |
| <b>UCa (micromol/ 24h)</b>           | <b>2.24</b>                   | <b>1.2</b>                                                             | <b>2.5-7.5</b>       |
| <b>UPh (micromol/ 24h)</b>           | <b>5.4</b>                    | <b>19.8</b>                                                            | <b>13-42</b>         |
| <b>UOx (micromole/ 24h)</b>          | <b>1150</b>                   | <b>255</b>                                                             | <b>78-489</b>        |
| <b>UGlycerate/Cr ( mmol/mol)</b>     | <b>7</b>                      |                                                                        | <b>&lt;108</b>       |
| <b>UGlycolate/Cr (micromol/mol)</b>  | <b>2</b>                      |                                                                        | <b>&lt;6</b>         |
| <b>UCitrate/Cr (micromol/mol)</b>    | <b>12</b>                     |                                                                        | <b>&lt;457</b>       |
| <b>UIsocitrate/Cr (micromol/mol)</b> | <b>8</b>                      |                                                                        | <b>&lt;49</b>        |
| <b>POx (micromole/l)</b>             | <b>5</b>                      |                                                                        | <b>&lt;33</b>        |
